# Supplementary material for: Validation of the HTC VIVE Ultimate Trackers Compared with the Vicon Motion Capture System at Slow, Moderate and Fast Gait Speeds
Source: Research Square preprint supplement (doi:10.21203/rs.3.rs-6989733/v1), 2025-10-01
Supplement: Supplementary file 3 [file d15e603caad6baa224ae8f7f.xlsx]

## Sheet: Sheet2
Appendix B Linear mixed model parameter estimates (millimetre) for random and main fixed effects on absolute errors between Vicon and Ultimate Tracker.
Random effects	Variance	SD	95% CI	AC
Participant	2.13	1.46	-0.76 to 5.03
Frames	0.42	0.65	-0.86 to 1.7	0.98
Residuals	18.2	4.26	9.74 to 26.6
Fixed effects	β	SE	95% CI	p
Main effects
Intercept (0.5 m/s, Sacrum, VT)	0.51	0.46	-0.41 to 1.43	0.271
Speed 1.0 m/s	0.11	0.03	0.05 to 0.16	<.001
Speed 1.5 m/s	0.43	0.03	0.38 to 0.48	<.001
Speed 2.0 m/s	1.02	0.03	0.97 to 1.08	<.001
Right foot	1.07	0.03	1.02 to 1.13	<.001
Left foot	1	0.03	0.95 to 1.06	<.001
Direction: ML	1.15	0.03	1.10 to 1.21	<.001
Direction: AP	3.15	0.03	3.10 to 3.20	<.001
Interactions
Speed 1.0: Right foot	0.94	0.04	0.87 to 1.02	<.001
Speed 1.5: Right foot	0.77	0.04	0.70 to 0.85	<.001
Speed 2.0: Right foot	0.17	0.04	0.09 to 0.24	<.001
Speed 1.0: Left foot	0.73	0.04	0.65 to 0.80	<.001
Speed 1.5: Left foot	0.74	0.04	0.66 to 0.81	<.001
Speed 2.0: Left foot	0.2	0.04	0.13 to 0.28	<.001
Speed 1.0: Direction ML	-0.54	0.04	-0.62 to -0.47	<.001
Speed 1.5: Direction ML	-0.93	0.04	-1.00 to -0.85	<.001
Speed 2.0: Direction ML	-1.31	0.04	-1.39 to -1.24	<.001
Speed 1.0: Direction AP	-1.04	0.04	-1.12 to -0.97	<.001
Speed 1.5: Direction AP	-1.39	0.04	-1.47 to -1.32	<.001
Speed 2.0: Direction AP	-2.09	0.04	-2.16 to -2.01	<.001
Right foot: Direction ML	-0.89	0.04	-0.96 to -0.81	<.001
Left foot: Direction ML	-0.69	0.04	-0.77 to -0.62	<.001
Right foot: Direction AP	2	0.04	1.92 to 2.08	<.001
Left foot: Direction AP	2.6	0.04	2.52 to 2.67	<.001
Speed 1.0: Right foot: Direction ML	-0.18125	0.05393	-0.29 to -0.07	0.000778
Speed 1.5: Right foot: Direction ML	0.06824	0.05393	-0.04 to 0.18	0.205775
Speed 2.0: Right foot: Direction ML	0.78522	0.05393	0.68 to 0.89	< 0.001
Speed 1.0: Left foot: Direction ML	-0.08211	0.05393	-0.19 to 0.02	0.127899
Speed 1.5: Left foot: Direction ML	0.07243	0.05393	-0.03 to 0.18	0.179303
Speed 2.0: Left foot: Direction ML	0.5829	0.05393	0.48 to 0.69	< 0.001
Speed 1.0: Right foot: Direction AP	1.08835	0.05393	0.98 to 1.20	< 0.001
Speed 1.5: Right foot: Direction AP	2.80031	0.05393	2.69 to 2.91	< 0.001
Speed 2.0: Right foot: Direction AP	4.5886	0.05393	4.48 to 4.70	< 0.001
Speed 1.0: Left foot: Direction AP	1.12048	0.05393	1.01 to 1.23	< 0.001
Speed 1.5: Left foot: Direction AP	1.87868	0.05393	1.77 to 1.99	< 0.001
Speed 2.0: Left foot: Direction AP	3.67923	0.05393	3.57 to 3.79	< 0.001
SD: standard deviation, AC: autocorrelation, β: slope estimate, SE: standard error, CI: confidence interval, ML: medio-lateral, AP: anterior-posterior, VT: vertical.
